# Supplementary material for: Synthesis, structure, and reactivity of fluorous phosphorus/carbon/phosphorus pincer ligands and metal complexes
Source: Royal Society of Chemistry journal article supplement (doi:10.1039/b502309b), 2005-01-01
Supplement: b502309b.pdf [file b502309b.pdf]

# SUPPORTING INFORMATION

for

Synthesis, Structure, and Reactivity of Fluorous Phosphorus/Carbon/Phosphorus  
Pincer Ligands and Metal Complexes

**Róbert Tuba, Verona Tessevic, Long V. Dinh, Frank Hampel, and J. A. Gladysz\***

Institut für Organische Chemie, Friedrich-Alexander Universität Erlangen-Nürnberg, Henkestrasse  
42, 91054 Erlangen, Germany

*submitted to: Dalton Transactions*

Additional experiments and details relevant to Scheme 3 are as follows.

In preliminary experiments, **5-R<sub>f8</sub>** and *n*-BuLi were combined at 0 or -40 °C in THF to generate the phosphorus anion LiP(CH<sub>2</sub>CH<sub>2</sub>R<sub>f8</sub>)<sub>2</sub>. However, when **2** was added to the resulting deep purple suspensions, a multitude of products were obtained. Note that the initially formed phosphine can react with further **2**, providing a route to **7-R<sub>f8</sub>**. In another experiment based upon close literature precedent,<sup>s1</sup> **5-R<sub>f8</sub>**, CsOH, and powdered molecular sieves were combined in DMF. Then **2** was added. However, no reaction was observed over the course of 2 d.

A reaction sequence involving the fluoros phosphine borane **9-R<sub>f8</sub>**, *t*-BuOK, THF, and **2** was conducted with similar conditions to that using KOH and ethanol (see experimental below). However, a multitude of products formed. Finally, **9-R<sub>f8</sub>** and *n*-BuLi were combined in THF at -78 °C in an NMR tube. A <sup>31</sup>P NMR spectrum of the resulting brown suspension showed the apparent consumption of **9-R<sub>f8</sub>**. No new signals appeared as the sample was warmed to -40 °C. Then **2** was added. However, no substitution products formed over an extended period. Only the starting **9-R<sub>f8</sub>** and some **5-R<sub>f8</sub>** could be detected.

**1,3-C<sub>6</sub>H<sub>4</sub>(CH<sub>2</sub>P(CH<sub>2</sub>CH<sub>2</sub>R<sub>f8</sub>)<sub>2</sub>)<sub>2</sub> (3-R<sub>f8</sub>). D.** A Schlenk flask was charged with (H<sub>3</sub>B)PH-(CH<sub>2</sub>CH<sub>2</sub>R<sub>f8</sub>)<sub>2</sub> (**9-R<sub>f8</sub>**; 0.1660 g, 0.1766 mmol)<sup>21b</sup> and ethanol (3 mL). Then a solution of KOH (0.0085 g, 0.15 mmol) in ethanol (0.2 mL) was added with stirring. The colorless solution turned light yellow. After 15 min, **2** (0.0187 g, 0.0708 mmol) was added. After 3 d, the solvent was removed by oil pump vacuum. The residue was dissolved in THF/HNEt<sub>2</sub> (8 mL, 1:1 v/v). The mixture was immersed in a 50 °C oil bath. After 1 h, the solvents were removed by oil pump vacuum. The residue was dissolved in THF. Integration of a <sup>31</sup>P NMR spectrum (internal [D<sub>6</sub>]DMSO capillary) showed the major species to be **5-R<sub>f8</sub>**, and less than 5% of **3-R<sub>f8</sub>**.

(s1) M. T. Honaker, B. J. Sandefur, J. L. Hargett, A. L. McDaniel, R. N. Salvatore, *Tetrahedron Lett.* **2003**, *44*, 8373.
